# Supplementary material for: Exploring Renal Changes after Bariatric Surgery in Patients with Severe Obesity
Source: MDPI journal article supplement (doi:10.3390/jcm11030728), 2022-01-29
Supplement: s1 [file s1]

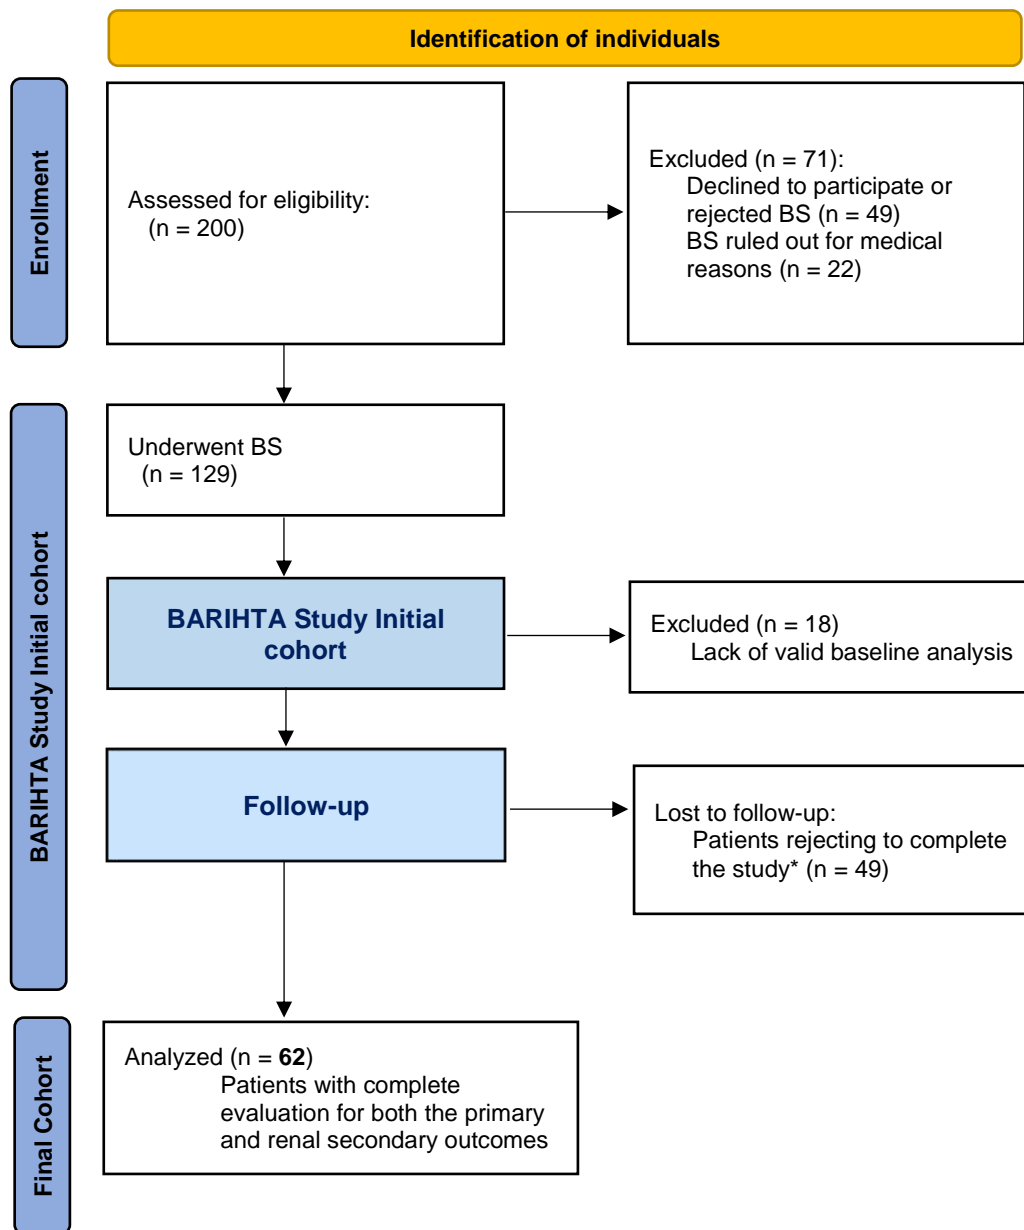

BS = Bariatric surgery

Figure S1. Flowchart for participants in the BARIHTA Study. \* Most patients rejected to complete the study because of complains about wearing the 24h-Mobile-O-Graph® device or due to work reasons (having achieved work reinsertion after losing weight)

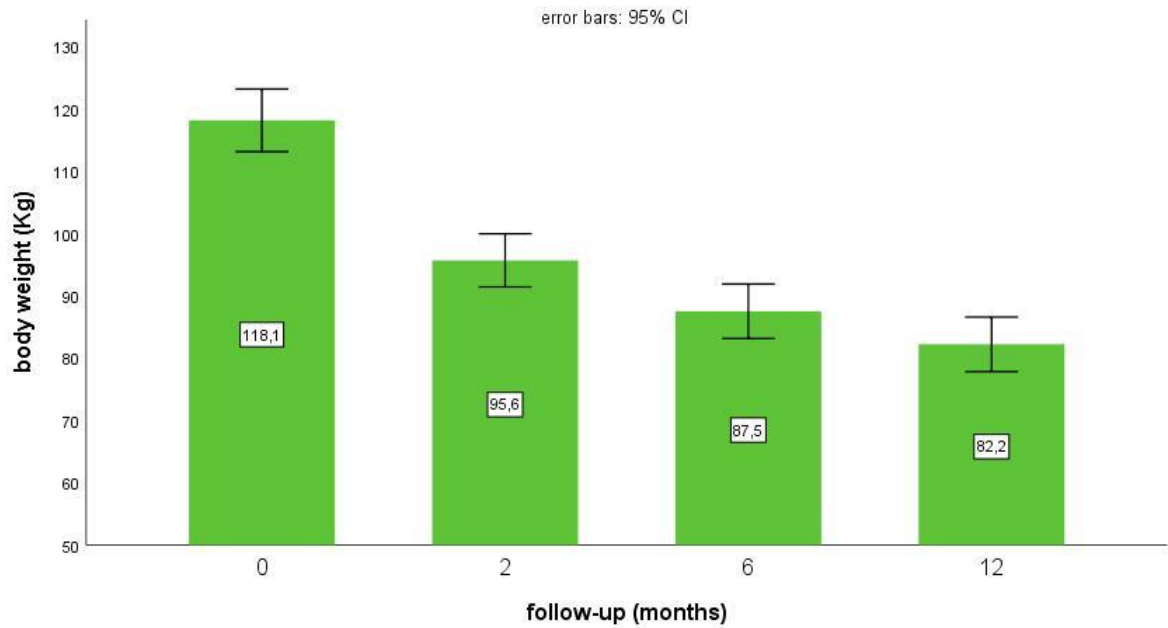

Figure S2. Body weight change at follow-up.

Table S1. Changes in adipokines and inflammatory markers 12-months after bariatric surgery.

|                                  | Before BS                     | 12- months post-BS            | p                |
|----------------------------------|-------------------------------|-------------------------------|------------------|
| <b>Leptin*</b> ,<br>ng/mL        | 56.5 [28.8;<br>73.7]          | 12.8 [8.1;<br>33.2]           | <b>&lt;0.001</b> |
| <b>Adiponectine*</b> ,<br>µg/mL  | 19.0 [12.5;<br>33.3]          | 29.0 [15.5;<br>59.0]          | <b>0.017</b>     |
| <b>Resistin</b> ,<br>ng/mL       | 37.4 ± 15.9                   | 33.6 ± 12.1                   | 0.091            |
| <b>MCP-1</b> ,<br>pg/mL          | 556.6 ± 204.1                 | 554.0 ± 219.8                 | 0.930            |
| <b>Angiopoietin2*</b> ,<br>µg/mL | 2676.2<br>[1815.4;<br>4067.0] | 4540.5<br>[2094.2;<br>6190.4] | <b>0.012</b>     |
| <b>hs-CRP*</b> ,<br>mg/dL        | 0.77 [0.43;<br>1.41]          | 0.11 [0.06;<br>0.29]          | <b>&lt;0.001</b> |

(\*) Data shown as median [interquartile range]

BS = bariatric surgery; **hs-CRP** = C-reactive protein; **MCP-1** = monocyte chemoattractant protein-1

Table S2. Determinants of variation of eGFR (S2A) and of variation of albuminuria (S2B)

S2A.

| eGFR                  | All patients (n = 62) |              |                  | Patients without antihypertensive treatment (n = 42) |              |              |
|-----------------------|-----------------------|--------------|------------------|------------------------------------------------------|--------------|--------------|
|                       | Coeff.                | 95% CI       | p-value          | Coeff.                                               | 95% CI       | p-value      |
| Months FU             | -0.56                 | -1.98, 0.87  | 0.443            | -0.95                                                | -2.88, 0.99  | 0.337        |
| Body weight, Kg       | 0.66                  | 0.35, 0.96   | <b>&lt;0.001</b> | 0.50                                                 | 0.11, 0.88   | <b>0.012</b> |
| 24h-systolic BP, mmHg | 0.32                  | -0.04, 0.67  | 0.082            | -0.04                                                | -0.54, 0.46  | 0.872        |
| Aldosterone, ng/dL    | -0.10                 | -0.15, -0.05 | <b>&lt;0.001</b> | -0.06                                                | -0.12, -0.00 | <b>0.033</b> |
| HOMA index            | 0.47                  | -0.62, 1.57  | 0.398            | 1.25                                                 | 0.13, 2.37   | <b>0.029</b> |

BP = blood pressure; eGFR = estimated glomerular filtration rate; FU = follow-up; HOMA = homeostasis model assessment-estimated insulin resistance.

S2B.

| lnACR                 | All patients (n = 62) |              |                  | Patients without antihypertensive treatment (n = 42) |             |              |
|-----------------------|-----------------------|--------------|------------------|------------------------------------------------------|-------------|--------------|
|                       | Coeff.                | 95% CI       | p-value          | Coeff.                                               | 95% CI      | p-value      |
| Months FU             | -0.02                 | -0.07, 0.02  | 0.278            | -0.04                                                | -0.10, 0.01 | 0.119        |
| Body weight, Kg       | -0.00                 | -0.01, 0.00  | 0.364            | -0.00                                                | -0.01, 0.01 | 0.516        |
| 24h-systolic BP, mmHg | 0.02                  | 0.01, 0.03   | <b>&lt;0.001</b> | -0.01                                                | -0.02, 0.01 | 0.333        |
| Aldosterone, ng/dL    | 0.00                  | --0.00, 0.00 | 0.430            | 0.00                                                 | -0.00, 0.00 | 0.980        |
| HOMA index            | 0.05                  | 0.01, 0.08   | <b>0.012</b>     | 0.04                                                 | 0.01, 0.07  | <b>0.022</b> |

BP = blood pressure; FU = follow-up; HOMA = homeostasis model assessment-estimated insulin resistance; lnACR = log-transformed albumin-creatinine ratio.
